# Supplementary material
Source: Springer Nature journal article supplement (https://www.springermedizin.de/resource/supplementary/13054_2011_501_MOESM2_ESM.pdf/9707100)

## Comparison of two groups of EMS Systems (RTR > or < 70%)

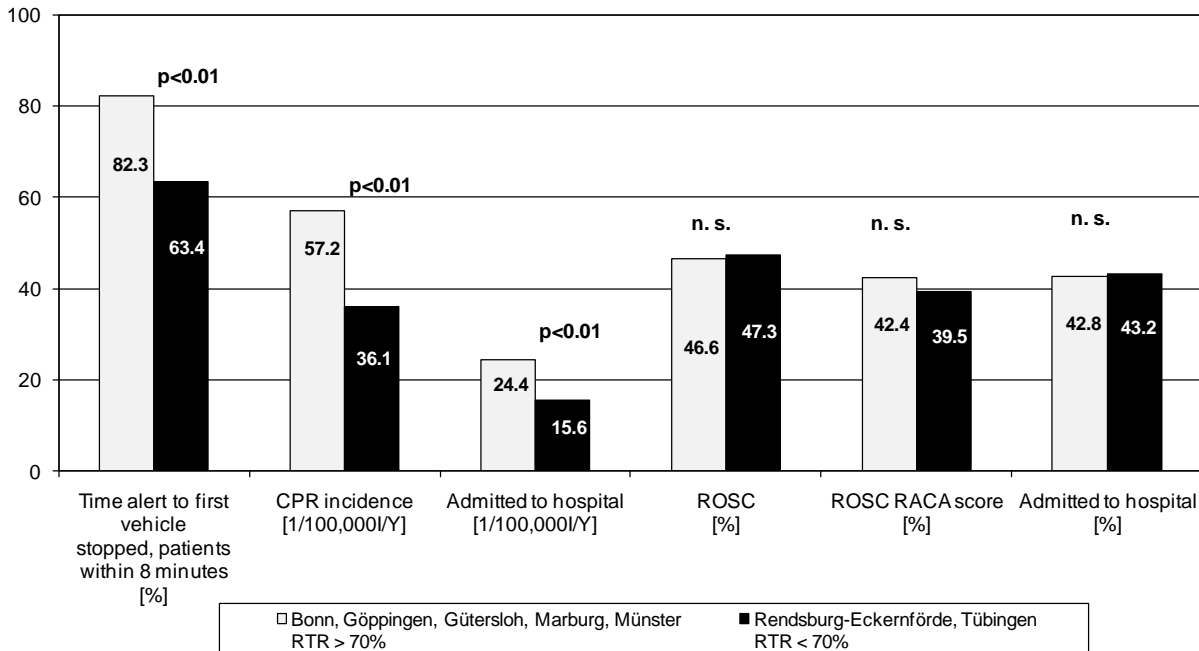

Supplement: MOESM2 [file 9707100]
